# Supplementary material for: Effects of indoor coal fine particulate matter on the expression levels of inflammatory factors in ovalbumin-induced mice
Source: Royal Society of Chemistry journal article supplement (doi:10.1039/c8tx00221e), 2018-11-01
Supplement: c8tx00221e1.pdf [file c8tx00221e1.pdf]

## Appendix A

Effect of indoor coal PM2.5 on the expression level of Foxp3 mRNA in OVA-induced asthmatic rats

### Method

Forty six-week-old male SD rats were divided into four groups randomly (Control, OVA, PM2.5, PM2.5+OVA). Normal saline, OVA (15ug / mL) and/or PM2.5 (2.5mg / mL) were given to the four groups respectively through intratracheal instillation for two weeks one time, four times totally. 24 hours after the last intra-tracheal instillation, the lung tissue were collected to detect Foxp3 mRNA expression level by PR-PCR.

### Result

In lung tissue, the expression level of Foxp3 mRNA in control group was significantly higher than that in PM2.5+OVA groups ( $P<0.05$ ).

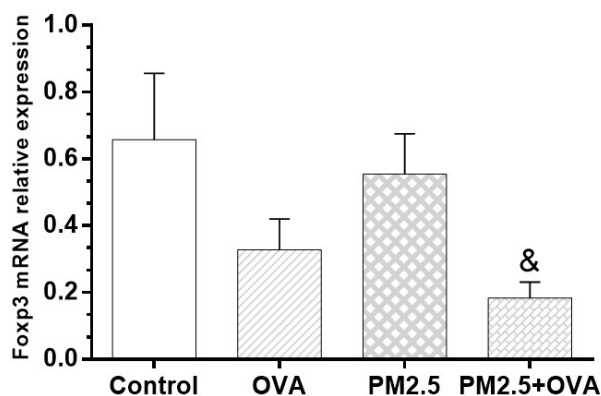

& vs control,  $P<0.05$

Figure 1. Effect of indoor coal PM2.5 on the expression level of Foxp3 mRNA in OVA-induced asthmatic rats
